# Supplementary material for: Effects of 1,25-Vitamin D3 and 24,25-Vitamin D3 on Corneal Nerve Regeneration in Diabetic Mice
Source: MDPI journal article supplement (doi:10.3390/biom13121754), 2023-12-06
Supplement: s1 [file s1]

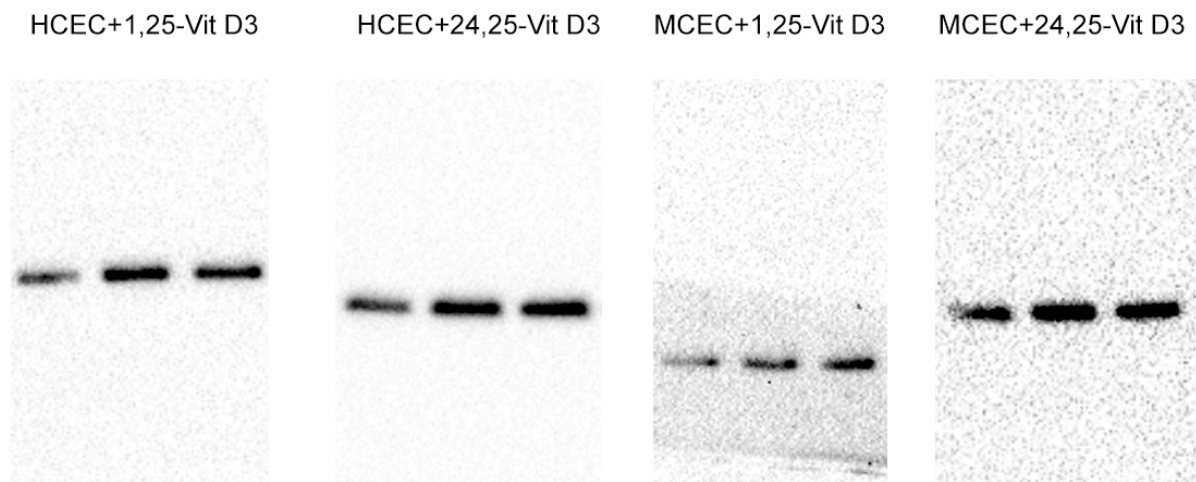

**Figure S1.** Uncropped images of Figure 7 western blots.

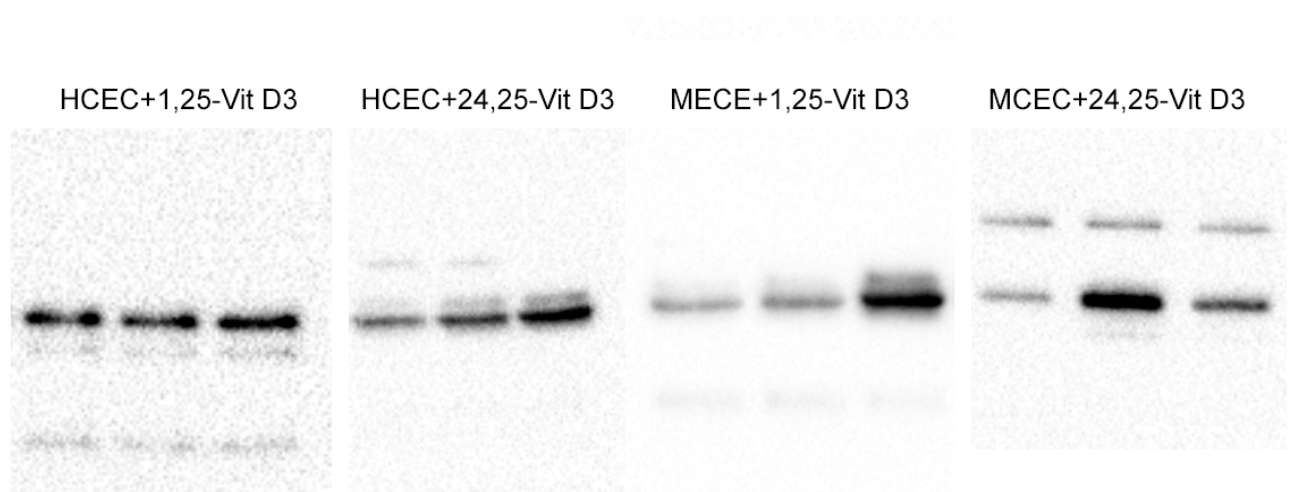

**Figure S2.** Uncropped images of Figure 8 western blots.

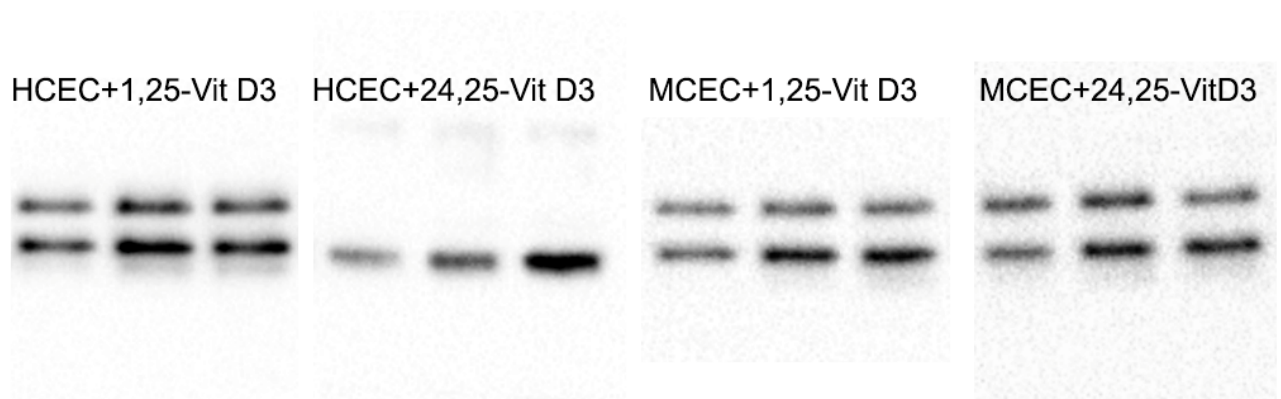

**Figure S3.** Uncropped images of Figure 9 western blots.

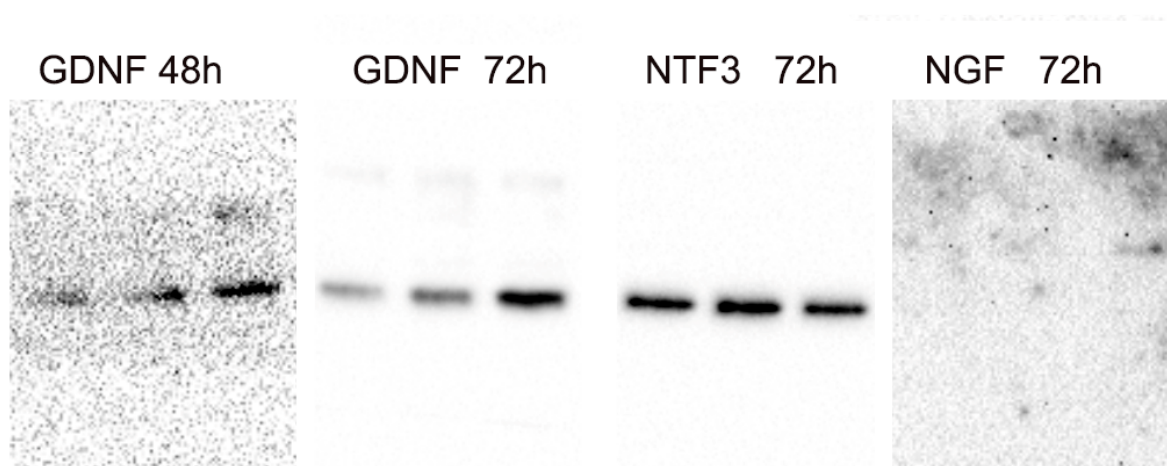

**Figure S4.** Uncropped images of Figure 10 western blot.
